# Supplementary material for: Retrospective analysis of estrogen receptor (ER), progesterone receptor (PR), human epidermal growth factor receptor-2 (HER2), Ki67 changes and their clinical significance between primary breast cancer and metastatic tumors
Source: PeerJ. 2024 May 15;12:e17377. doi: 10.7717/peerj.17377 (PMC11102064; doi:10.7717/peerj.17377)
Supplement: Supplemental Information 2 [file peerj-12-17377-s002.xlsx]

## Sheet: Sheet1
Serial number	Hospital admission number	P: Histologic Type (P: Primary lesion)	P: Grade of histology (ESBR)	P: Age (years)	P: Age Groups (years)	P: Left or right breast	P: Maximum diameter of tumor	P: T stage	P: Lymph node metastasis	P: Number of metastatic lymph nodes	P: N stage	P: Endocrine Therapy	P: Chemotherapy	P: Targeted Therapy	P: ER	P: PR	P: HER2	P: Ki67%	P: Ki67	P: Molecular Subtyping	M: Age (years) (M: Metastatic lesions)	M: Age Groups (years)	M: ER	M: PR	M: HER2	M: Ki67%	M: Ki67	M: Molecular Subtyping	M: Site of metastasis	M: Local recurrence/Distant metastasis	M： Disease-free survival (months)	Does the molecular typing of primary and metastatic lesions chang?	Changes in molecular typing of primary and metastatic lesions	Does the ER of primary and metastatic lesions change?	Changes in ER of primary and metastatic lesions	Does the PR of primary and metastatic lesions change?	Changes in PR of primary and metastatic lesions	Does the HER2 of primary and metastatic lesions change?	Changes in HER2 of primary and metastatic lesions	Does the Ki67 of primary and metastatic lesions change?	Changes in Ki67 of primary and metastatic lesions
1	4519181	Invasive ductal carcinoma	3	54	＞35	Left	6	T3	Yes	7	N2	No	Yes	Yes	-	-	+	40	High expression	HER2-overexpression	55	＞35	+	High expression	+	40	High expresison	B(HER2+)	Liver	Distant metastasis	12	Yes	HER2-overexpression→B(HER2+)	Yes	(-)→(+)	Yes	(-)→(+)	No	(+)→(+)	No	High expression→High expression
2	4499669	Invasive ductal carcinoma	3	52	＞35	Right	3	T2	Yes	7	N2	No	Yes	No	-	-	+	40	High expression	HER2-overexpression	54	＞35	-	-	+	Unknown	Unknown	HER2-overexpression	Hydrothorax and ascites	Distant metastasis	21	No	HER2-overexpression→HER2-overexpression	No	(-)→(-)	No	(-)→(-)	No	(+)→(+)	Unknown	Unknown
3	4486131	Invasive ductal carcinoma	2	58	＞35	Right	6	T3	Yes	2	N1	No	Yes	No	+	High expression	-	20	Low expression	A	63	＞35	+	High expression	-	Unknown	Unknown	Unknown	Lung/pleura	Distant metastasis	53	Unknown	Unknown	No	(+)→(+)	No	(+)→(+)	No	(-)→(-)	Unknown	Unknown
4	4445980	Invasive ductal carcinoma	2	65	＞35	Left	4.5	T2	Yes	2	N1	Yes	Yes	No	+	High expression	-	20	Low expression	A	68	＞35	+	High expression	-	20	Low expresison	A	Ipsilateral chest wall	Local recurrence	39	No	A→A	No	(+)→(+)	No	(+)→(+)	No	(-)→(-)	No	Low expression→Low expresison
5	4486097	Invasive ductal carcinoma	2	44	＞35	Left	7	T3	Yes	10	N3	No	Yes	No	+	High expression	-	40	High expression	B(HER2-)	46	＞35	+	Unknown	-	Unknown	Unknown	Unknown	Hydrothorax and ascites	Distant metastasis	16	Unknown	Unknown	No	(+)→(+)	Unknown	Unknown	No	(-)→(-)	Unknown	Unknown
6	4520359	Invasive ductal carcinoma	2	49	＞35	Left	Unknown	Unknown	Yes	6	N2	Yes	Yes	No	-	-	-	Unknown	Unknown	Basal type	63	＞35	+	Low expression	+	40	High expresison	B(HER2+)	Liver	Distant metastasis	164	Yes	Basal type→B(HER2+)	Yes	(-)→(+)	Yes	(-)→(+)	Yes	(-)→(+)	Unknown	Unknown
7	4448077	Invasive ductal carcinoma	1	52	＞35	Right	1	T1	Yes	7	N2	No	Yes	No	-	-	+	30	High expression	HER2-overexpression	55	＞35	-	-	+	40	High expresison	HER2-overexpression	Ipsilateral axillary lymph nodes	Local recurrence	34	No	HER2-overexpression→HER2-overexpression	No	(-)→(-)	No	(-)→(-)	No	(+)→(+)	No	High expression→High expression
8	4529346	Invasive ductal carcinoma	Unknown	41	＞35	Right	Unknown	Unknown	No	0	N0	Yes	Yes	No	+	-	-	Unknown	Unknown	B(HER2-)	55	＞35	+	-	-	30	High expresison	B(HER2-)	Lung/pleura	Distant metastasis	169	No	B(HER2-)→B(HER2-)	No	(+)→(+)	No	(-)→(-)	No	(-)→(-)	Unknown	Unknown
9	4493477	Invasive ductal carcinoma	2	44	＞35	Right	9	T3	Yes	14	N3	No	Yes	No	+	High expression	-	30	High expression	B(HER2-)	45	＞35	-	-	-	30	High expresison	Basal type	Ipsilateral axillary lymph nodes	Local recurrence	15	Yes	B(HER2-)→Basal type	Yes	(+)→(-)	Yes	(+)→(-)	No	(-)→(-)	No	High expression→High expression
10	4409017	Invasive ductal carcinoma	2	51	＞35	Left	6	T3	Yes	1	N1	No	Yes	No	+	High expression	-	50	High expression	B(HER2-)	55	＞35	+	High expression	-	10	Low expresison	A	Ipsilateral chest wall	Local recurrence	50	Yes	B(HER2-)→A	No	(+)→(+)	No	(+)→(+)	No	(-)→(-)	Yes	High expression→Low expression
11	4480930	Invasive ductal carcinoma	1	60	＞35	Left	2.5	T2	Yes	2	N1	No	Yes	No	-	-	-	60	High expression	Basal type	66	＞35	-	-	+	10	Low expresison	HER2-overexpression	Peripheral lymph nodes	Distant metastasis	71	Yes	Basal type→HER2-overexpression	No	(-)→(-)	No	(-)→(-)	Yes	(-)→(+)	Yes	High expression→Low expression
12	4434253	Invasive ductal carcinoma	2	34	≤35	Left	1.5	T1	Yes	3	N1	No	Yes	No	+	Low expression	-	20	Low expression	B(HER2-)	37	＞35	+	-	-	50	High expresison	B(HER2-)	Neck	Distant metastasis	42	No	B(HER2-)→B(HER2-)	No	(+)→(+)	Yes	(+)→(-)	No	(-)→(-)	Yes	Low expression→High expression
13	4471466	Invasive ductal carcinoma	2	27	≤35	Right	6	T3	Yes	6	N2	No	Yes	Yes	+	-	+	30	High expression	B(HER2+)	29	≤35	+	-	+	70	High expresison	B(HER2+)	Hydrothorax and ascites	Distant metastasis	31	No	B(HER2+)→B(HER2+)	No	(+)→(+)	No	(-)→(-)	No	(+)→(+)	No	High expression→High expression
14	4457451	Invasive ductal carcinoma	2	39	＞35	Left	1.3	T1	Yes	1	N1	Yes	Yes	Yes	+	High expression	-	10	Low expression	A	42	＞35	+	High expression	-	40	High expresison	B(HER2-)	Lung/pleura	Distant metastasis	36	Yes	A→B(HER2-)	No	(+)→(+)	No	(+)→(+)	No	(-)→(-)	Yes	Low expression→High expression
15	4539612	Invasive ductal carcinoma	2	50	＞35	Right	3	T2	Yes	3	N1	No	Yes	No	+	High expression	-	10	Low expression	A	56	＞35	+	-	-	20	Low expresison	B(HER2-)	Hydrothorax and ascites	Distant metastasis	82	Yes	A→B(HER2-)	No	(+)→(+)	Yes	(+)→(-)	No	(-)→(-)	No	Low expression→Low expresison
16	4482564	Other	2	42	＞35	Right	2.5	T2	Yes	17	N3	Yes	Yes	No	+	High expression	-	40	High expression	B(HER2-)	44	＞35	+	High expression	-	60	High expresison	B(HER2-)	Contralateral axillary lymph nodes	Distant metastasis	25	No	B(HER2-)→B(HER2-)	No	(+)→(+)	No	(+)→(+)	No	(-)→(-)	No	High expression→High expression
17	4410353	Invasive ductal carcinoma	3	60	＞35	Left	4	T2	Yes	7	N2	Yes	Yes	No	+	High expression	+	30	High expression	B(HER2+)	65	＞35	-	-	+	Unknown	Unknown	HER2-overexpression	Bone	Distant metastasis	61	Yes	B(HER2+)→HER2-overexpression	Yes	(+)→(-)	Yes	(+)→(-)	No	(+)→(+)	Unknown	Unknown
18	4539775	Invasive ductal carcinoma	2	55	＞35	Right	1.6	T1	Yes	2	N1	Yes	Yes	No	+	High expression	-	80	High expression	B(HER2-)	56	＞35	-	High expression	-	40	High expresison	B(HER2-)	Ipsilateral chest wall	Local recurrence	20	No	B(HER2-)→B(HER2-)	Yes	(+)→(-)	No	(+)→(+)	No	(-)→(-)	No	High expression→High expression
19	4540097	Invasive ductal carcinoma	Unknown	57	＞35	Right	1	T1	No	0	N0	No	Yes	No	+	Low expression	-	Unknown	Unknown	B(HER2-)	70	＞35	+	High expression	-	40	High expresison	B(HER2-)	Bone	Distant metastasis	163	No	B(HER2-)→B(HER2-)	No	(+)→(+)	No	(+)→(+)	No	(-)→(-)	Unknown	Unknown
20	4499262	Invasive ductal carcinoma	2	68	＞35	Left	2.5	T2	Yes	7	N2	No	Yes	No	-	-	-	20	Low expression	Basal type	69	＞35	-	-	-	20	Low expresison	Basal type	Hydrothorax and ascites	Distant metastasis	18	No	Basal type→Basal type	No	(-)→(-)	No	(-)→(-)	No	(-)→(-)	No	Low expression→Low expresison
21	4443420	Invasive ductal carcinoma	2	52	＞35	Left	2	T1	Yes	2	N1	Yes	Yes	No	+	High expression	-	35	High expression	B(HER2-)	57	＞35	+	-	-	5	Low expresison	B(HER2-)	Bone	Distant metastasis	62	No	B(HER2-)→B(HER2-)	No	(+)→(+)	Yes	(+)→(-)	No	(-)→(-)	Yes	High expression→Low expression
22	4481036	Invasive ductal carcinoma	2	65	＞35	Right	3	T2	Yes	11	N3	No	Yes	Yes	-	-	+	30	High expression	HER2-overexpression	69	＞35	-	High expression	+	20	Low expresison	B(HER2+)	Contralateral axillary lymph nodes	Distant metastasis	53	Yes	HER2-overexpression→B(HER2+)	No	(-)→(-)	Yes	(-)→(+)	No	(+)→(+)	Yes	High expression→Low expression
23	4432531	Invasive ductal carcinoma	2	49	＞35	Left	1.5	T1	Yes	1	N1	Yes	Yes	Yes	+	Low expression	+	20	Low expression	B(HER2+)	53	＞35	+	-	+	25	Low expresison	B(HER2+)	Lung/pleura	Distant metastasis	47	No	B(HER2+)→B(HER2+)	No	(+)→(+)	Yes	(+)→(-)	No	(+)→(+)	No	Low expression→Low expresison
24	4542200	Invasive ductal carcinoma	2	55	＞35	Left	3.5	T2	Unknown	Unknown	Unknown	Yes	Yes	No	+	High expression	-	Unknown	Unknown	Unknown	65	＞35	+	Low expression	-	10	Low expresison	B(HER2-)	Hydrothorax and ascites	Distant metastasis	111	Unknown	Unknown	No	(+)→(+)	No	(+)→(+)	No	(-)→(-)	Unknown	Unknown
25	4544458	Invasive ductal carcinoma	2	58	＞35	Right	4.2	T2	No	0	N0	Yes	Yes	No	+	High expression	-	10	Low expression	A	64	＞35	+	-	-	20	Low expresison	B(HER2-)	Bone	Distant metastasis	64	Yes	A→B(HER2-)	No	(+)→(+)	Yes	(+)→(-)	No	(-)→(-)	No	Low expression→Low expresison
26	4448913	Invasive ductal carcinoma	Unknown	50	＞35	Left	Unknown	Unknown	Unknown	Unknown	Unknown	No	Yes	No	+	Low expression	-	30	High expression	B(HER2-)	56	＞35	-	Low expression	-	30	High expresison	B(HER2-)	Hydrothorax and ascites	Distant metastasis	63	No	B(HER2-)→B(HER2-)	Yes	(+)→(-)	No	(+)→(+)	No	(-)→(-)	No	High expression→High expression
27	4379849	Invasive ductal carcinoma	2	60	＞35	Left	3.5	T2	Yes	2	N1	No	Yes	No	-	-	-	Unknown	Unknown	Basal type	69	＞35	-	-	-	40	High expresison	Basal type	Peripheral lymph nodes	Distant metastasis	98	No	Basal type→Basal type	No	(-)→(-)	No	(-)→(-)	No	(-)→(-)	Unknown	Unknown
28	4508083	Invasive ductal carcinoma	3	49	＞35	Left	2	T1	Yes	1	N1	No	Yes	No	-	-	-	80	High expression	Basal type	51	＞35	-	-	-	80	High expresison	Basal type	Ipsilateral axillary lymph nodes	Local recurrence	18	No	Basal type→Basal type	No	(-)→(-)	No	(-)→(-)	No	(-)→(-)	No	High expression→High expression
29	4547573	Invasive ductal carcinoma	3	66	＞35	Right	2.5	T2	No	0	N0	No	Yes	No	-	-	+	30	High expression	HER2-overexpression	67	＞35	-	-	+	70	High expresison	HER2-overexpression	Ipsilateral chest wall	Local recurrence	7	No	HER2-overexpression→HER2-overexpression	No	(-)→(-)	No	(-)→(-)	No	(+)→(+)	No	High expression→High expression
30	4459200	Invasive ductal carcinoma	3	60	＞35	Left	21	T3	Yes	8	N2	No	Yes	Yes	+	High expression	+	30	High expression	B(HER2+)	64	＞35	+	-	+	40	High expresison	B(HER2+)	Contralateral axillary lymph nodes	Distant metastasis	41	No	B(HER2+)→B(HER2+)	No	(+)→(+)	Yes	(+)→(-)	No	(+)→(+)	No	High expression→High expression
31	4526816	Invasive ductal carcinoma	2	57	＞35	Right	5	T2	Yes	25	N3	Yes	Yes	No	+	High expression	-	50	High expression	B(HER2-)	62	＞35	+	-	-	40	High expresison	B(HER2-)	Liver	Distant metastasis	63	No	B(HER2-)→B(HER2-)	No	(+)→(+)	Yes	(+)→(-)	No	(-)→(-)	No	High expression→High expression
32	4549451	Invasive ductal carcinoma	2	51	＞35	Right	2.5	T2	Yes	4	N2	No	Yes	No	+	-	-	Unknown	Unknown	B(HER2-)	60	＞35	-	-	+	20	Low expresison	HER2-overexpression	Liver	Distant metastasis	92	Yes	B(HER2-)→HER2-overexpression	Yes	(+)→(-)	No	(-)→(-)	Yes	(-)→(+)	Unknown	Unknown
33	4510102	Invasive ductal carcinoma	3	58	＞35	Left	2	T1	No	0	N0	Yes	Yes	No	+	-	-	60	High expression	B(HER2-)	60	＞35	-	-	-	70	High expresison	Basal type	Peripheral lymph nodes	Distant metastasis	19	Yes	B(HER2-)→Basal type	Yes	(+)→(-)	No	(-)→(-)	No	(-)→(-)	No	High expression→High expression
34	4494784	Invasive ductal carcinoma	Unknown	51	＞35	Left	Unknown	Unknown	Yes	1	N1	Yes	Yes	No	-	High expression	-	Unknown	Unknown	B(HER2-)	64	＞35	+	High expression	+	30	High expresison	B(HER2+)	Peripheral lymph nodes	Distant metastasis	150	Yes	B(HER2-)→B(HER2+)	Yes	(-)→(+)	No	(+)→(+)	Yes	(-)→(+)	Unknown	Unknown
35	4457338	Invasive ductal carcinoma	3	44	＞35	Right	2	T1	Yes	8	N2	No	Yes	No	-	High expression	-	Unknown	Unknown	B(HER2-)	52	＞35	-	-	-	20	High expresison	Basal type	Liver	Distant metastasis	98	Yes	B(HER2-)→Basal type	No	(-)→(-)	Yes	(+)→(-)	No	(-)→(-)	Unknown	Unknown
36	4550286	Invasive ductal carcinoma	2	48	＞35	Left	3.5	T2	No	0	N0	Yes	Yes	No	+	High expression	-	20	Low expression	A	55	＞35	+	High expression	-	30	High expresison	B(HER2-)	Ipsilateral chest wall	Local recurrence	85	Yes	A→B(HER2-)	No	(+)→(+)	No	(+)→(+)	No	(-)→(-)	Yes	Low expression→High expression
37	4498878	Invasive ductal carcinoma	2	59	＞35	Right	0.5	T1	Yes	12	N3	No	Yes	Yes	-	-	+	30	High expression	HER2-overexpression	61	＞35	-	-	+	30	High expresison	HER2-overexpression	Ipsilateral axillary lymph nodes	Local recurrence	24	No	HER2-overexpression→HER2-overexpression	No	(-)→(-)	No	(-)→(-)	No	(+)→(+)	No	High expression→High expression
38	4406699	Invasive ductal carcinoma	2	39	＞35	Right	1.8	T1	Yes	1	N1	Yes	Yes	No	+	High expression	-	30	High expression	B(HER2-)	44	＞35	+	High expression	-	40	High expresison	B(HER2-)	Ovaries	Distant metastasis	62	No	B(HER2-)→B(HER2-)	No	(+)→(+)	No	(+)→(+)	No	(-)→(-)	No	High expression→High expression
39	4504005	Invasive ductal carcinoma	Unknown	30	≤35	Right	2	T1	No	0	N0	No	Yes	No	-	-	-	60	High expression	Basal type	32	≤35	-	-	-	60	High expresison	Basal type	Contralateral axillary lymph nodes	Distant metastasis	22	No	Basal type→Basal type	No	(-)→(-)	No	(-)→(-)	No	(-)→(-)	No	High expression→High expression
40	4552685	Invasive ductal carcinoma	3	72	＞35	Right	5	T2	Yes	8	N2	No	Yes	No	+	Low expression	-	30	High expression	B(HER2-)	73	＞35	+	Low expression	-	20	Low expresison	B(HER2-)	Hydrothorax and ascites	Distant metastasis	8	No	B(HER2-)→B(HER2-)	No	(+)→(+)	No	(+)→(+)	No	(-)→(-)	Yes	High expression→Low expression
41	4449647	Invasive ductal carcinoma	Unknown	47	＞35	Left	Unknown	Unknown	Yes	4	N2	Yes	Yes	No	+	High expression	-	15	Low expression	A	55	＞35	-	-	-	10	Low expresison	Basal type	Bone	Distant metastasis	93	Yes	A→Basal type	Yes	(+)→(-)	Yes	(+)→(-)	No	(-)→(-)	No	Low expression→Low expresison
42	4532614	Invasive ductal carcinoma	Unknown	38	＞35	Left	4.5	T2	Yes	10	N3	Yes	Yes	No	+	High expression	-	5	Low expression	A	44	＞35	-	-	-	30	High expresison	Basal type	Lung/pleura	Distant metastasis	75	Yes	A→Basal type	Yes	(+)→(-)	Yes	(+)→(-)	No	(-)→(-)	Yes	Low expression→High expression
43	4461467	Invasive ductal carcinoma	2	50	＞35	Right	3	T2	Yes	7	N2	Yes	Yes	Yes	+	-	-	40	High expression	B(HER2-)	54	＞35	+	-	-	30	High expresison	B(HER2-)	Lung/pleura	Distant metastasis	42	No	B(HER2-)→B(HER2-)	No	(+)→(+)	No	(-)→(-)	No	(-)→(-)	No	High expression→High expression
44	4541000	Invasive ductal carcinoma	2	50	＞35	Right	3	T2	Yes	1	N1	Yes	Yes	No	+	Low expression	-	50	High expression	B(HER2-)	51	＞35	+	Low expression	-	40	High expresison	B(HER2-)	Liver	Distant metastasis	14	No	B(HER2-)→B(HER2-)	No	(+)→(+)	No	(+)→(+)	No	(-)→(-)	No	High expression→High expression
45	4504894	Invasive ductal carcinoma	2	69	＞35	Right	0.8	T1	Yes	9	N2	No	No	Yes	-	-	+	25	Low expression	HER2-overexpression	71	＞35	-	-	+	40	High expresison	HER2-overexpression	Peripheral lymph nodes	Distant metastasis	24	No	HER2-overexpression→HER2-overexpression	No	(-)→(-)	No	(-)→(-)	No	(+)→(+)	Yes	Low expression→High expression
46	4463930	Invasive ductal carcinoma	Unknown	46	＞35	Left	Unknown	Unknown	Yes	3	N1	Yes	Yes	No	+	High expression	+	Unknown	Unknown	B(HER2+)	53	＞35	-	-	+	50	High expresison	HER2-overexpression	Hydrothorax and ascites	Distant metastasis	92	Yes	B(HER2+)→HER2-overexpression	Yes	(+)→(-)	Yes	(+)→(-)	No	(+)→(+)	Unknown	Unknown
47	4535430	Invasive ductal carcinoma	3	33	≤35	Left	2.3	T2	Yes	2	N1	Yes	Yes	No	+	High expression	-	40	High expression	B(HER2-)	34	≤35	+	High expression	-	20	Low expresison	A	Liver	Distant metastasis	14	Yes	B(HER2-)→A	No	(+)→(+)	No	(+)→(+)	No	(-)→(-)	Yes	High expression→Low expression
48	4462457	Invasive ductal carcinoma	3	25	≤35	Left	3	T2	Unknown	Unknown	Unknown	No	Yes	No	-	-	-	80	High expression	Basal type	28	≤35	-	Low expression	-	80	High expresison	B(HER2-)	Abdominal wall	Distant metastasis	46	Yes	Basal type→B(HER2-)	No	(-)→(-)	Yes	(-)→(+)	No	(-)→(-)	No	High expression→High expression
49	4562885	Invasive ductal carcinoma	3	54	＞35	Left	1.5	T1	No	0	N0	Yes	Yes	No	+	High expression	-	70	High expression	B(HER2-)	57	＞35	-	High expression	-	70	High expresison	B(HER2-)	Ipsilateral chest wall	Local recurrence	39	No	B(HER2-)→B(HER2-)	Yes	(+)→(-)	No	(+)→(+)	No	(-)→(-)	No	High expression→High expression
50	4562664	Invasive ductal carcinoma	3	35	≤35	Left	8	T3	Yes	15	N3	Yes	Yes	Yes	+	High expression	+	50	High expression	B(HER2+)	37	＞35	+	High expression	+	50	High expresison	B(HER2+)	Ipsilateral chest wall	Local recurrence	24	No	B(HER2+)→B(HER2+)	No	(+)→(+)	No	(+)→(+)	No	(+)→(+)	No	High expression→High expression
51	4563354	Invasive ductal carcinoma	3	27	≤35	Right	5.5	T3	Yes	25	N3	Yes	Yes	No	-	High expression	-	50	High expression	B(HER2-)	32	≤35	+	High expression	+	70	High expresison	B(HER2+)	Hydrothorax and ascites	Distant metastasis	58	Yes	B(HER2-)→B(HER2+)	Yes	(-)→(+)	No	(+)→(+)	Yes	(-)→(+)	No	High expression→High expression
52	4535661	Invasive ductal carcinoma	3	51	＞35	Right	2.4	T2	No	0	N0	No	Yes	Yes	+	-	+	50	High expression	B(HER2+)	55	＞35	+	-	-	20	Low expresison	B(HER2-)	Ipsilateral axillary lymph nodes	Local recurrence	53	Yes	B(HER2+)→B(HER2-)	No	(+)→(+)	No	(-)→(-)	Yes	(+)→(-)	Yes	High expression→Low expression
53	4564409	Invasive ductal carcinoma	2	52	＞35	Left	2.2	T2	No	0	N0	Yes	Yes	No	+	-	+	30	High expression	B(HER2+)	56	＞35	+	Low expression	+	30	High expresison	B(HER2+)	Liver	Distant metastasis	48	No	B(HER2+)→B(HER2+)	No	(+)→(+)	Yes	(-)→(+)	No	(+)→(+)	No	High expression→High expression
54	4479703	Invasive ductal carcinoma	2	46	＞35	Right	5	T2	Yes	23	N3	No	Yes	No	+	High expression	-	40	High expression	B(HER2-)	50	＞35	-	Low expression	-	80	High expresison	B(HER2-)	Ipsilateral chest wall	Local recurrence	41	No	B(HER2-)→B(HER2-)	Yes	(+)→(-)	No	(+)→(+)	No	(-)→(-)	No	High expression→High expression
55	4566981	Invasive ductal carcinoma	Unknown	49	＞35	Right	3.5	T2	Yes	10	N3	No	Yes	No	+	High expression	-	20	Low expression	A	58	＞35	+	High expression	-	20	Low expresison	A	Ipsilateral axillary lymph nodes	Local recurrence	104	No	A→A	No	(+)→(+)	No	(+)→(+)	No	(-)→(-)	No	Low expression→Low expresison
56	4478067	Invasive ductal carcinoma	2	50	＞35	Right	6.5	T3	Yes	13	N3	No	Yes	No	+	Low expression	-	20	Low expression	B(HER2-)	54	＞35	+	Low expression	-	15	Low expresison	B(HER2-)	Liver	Distant metastasis	42	No	B(HER2-)→B(HER2-)	No	(+)→(+)	No	(+)→(+)	No	(-)→(-)	No	Low expression→Low expresison
57	4568085	Invasive ductal carcinoma	2	53	＞35	Left	4	T2	Yes	10	N3	Yes	Yes	No	+	Low expression	-	40-50	High expression	B(HER2-)	56	＞35	+	-	-	40	High expresison	B(HER2-)	Neck	Distant metastasis	35	No	B(HER2-)→B(HER2-)	No	(+)→(+)	Yes	(+)→(-)	No	(-)→(-)	No	High expression→High expression
58	4568481	Invasive ductal carcinoma	2	54	＞35	Right	1.8	T1	Yes	2	N1	Yes	Yes	No	+	High expression	-	70	High expression	B(HER2-)	63	＞35	-	-	-	30	High expresison	Basal type	Ipsilateral chest wall	Local recurrence	98	Yes	B(HER2-)→Basal type	Yes	(+)→(-)	Yes	(+)→(-)	No	(-)→(-)	No	High expression→High expression
59	4537682	Invasive ductal carcinoma	3	67	＞35	Left	4	T2	Yes	13	N3	No	Yes	No	-	-	+	40	High expression	HER2-overexpression	69	＞35	-	-	+	30	High expresison	HER2-overexpression	Lung/pleura	Distant metastasis	19	No	HER2-overexpression→HER2-overexpression	No	(-)→(-)	No	(-)→(-)	No	(+)→(+)	No	High expression→High expression
60	4501326	Invasive ductal carcinoma	3	44	＞35	Right	2.5	T2	Yes	1	N1	No	Yes	Yes	+	High expression	+	70	High expression	B(HER2+)	47	＞35	+	Low expression	+	40	High expresison	B(HER2+)	Ipsilateral chest wall	Local recurrence	33	No	B(HER2+)→B(HER2+)	No	(+)→(+)	No	(+)→(+)	No	(+)→(+)	No	High expression→High expression
61	4340884	Invasive ductal carcinoma	3	55	＞35	Right	1	T1	No	0	N0	Yes	Yes	No	+	High expression	-	40	High expression	B(HER2-)	64	＞35	+	Low expression	-	40	High expresison	B(HER2-)	Bone	Distant metastasis	109	No	B(HER2-)→B(HER2-)	No	(+)→(+)	No	(+)→(+)	No	(-)→(-)	No	High expression→High expression
62	4465196	Invasive ductal carcinoma	3	53	＞35	Left	3.5	T2	Yes	7	N2	No	Yes	No	-	-	+	70	High expression	HER2-overexpression	57	＞35	-	-	+	50	High expresison	HER2-overexpression	Contralateral axillary lymph nodes	Distant metastasis	49	No	HER2-overexpression→HER2-overexpression	No	(-)→(-)	No	(-)→(-)	No	(+)→(+)	No	High expression→High expression
63	4442427	Invasive ductal carcinoma	2	65	＞35	Left	2.8	T2	No	0	N0	Yes	Yes	No	+	High expression	-	20	Low expression	A	71	＞35	+	Low expression	-	30	High expresison	B(HER2-)	Lung/pleura	Distant metastasis	60	Yes	A→B(HER2-)	No	(+)→(+)	No	(+)→(+)	No	(-)→(-)	Yes	Low expression→High expression
64	4455753	Invasive ductal carcinoma	3	61	＞35	Right	1.5	T1	Yes	8	N2	Yes	Yes	No	+	High expression	-	40	High expression	B(HER2-)	66	＞35	+	Low expression	-	30	High expresison	B(HER2-)	Lung/pleura	Distant metastasis	54	No	B(HER2-)→B(HER2-)	No	(+)→(+)	No	(+)→(+)	No	(-)→(-)	No	High expression→High expression
65	4554351	Invasive ductal carcinoma	Unknown	62	＞35	Right	10	T3	Unknown	Unknown	Unknown	Yes	Yes	Yes	-	High expression	+	20	Low expression	B(HER2+)	63	＞35	-	-	+	50	High expresison	HER2-overexpression	Contralateral axillary lymph nodes	Distant metastasis	14	Yes	B(HER2+)→HER2-overexpression	No	(-)→(-)	Yes	(+)→(-)	No	(+)→(+)	Yes	Low expression→High expression
66	4559599	Invasive ductal carcinoma	2	59	＞35	Right	3	T2	No	0	N0	Yes	Yes	No	+	-	-	10	Low expression	B(HER2-)	62	＞35	+	-	-	5	Low expresison	B(HER2-)	Bone	Distant metastasis	35	No	B(HER2-)→B(HER2-)	No	(+)→(+)	No	(-)→(-)	No	(-)→(-)	No	Low expression→Low expresison
67	4573102	Invasive ductal carcinoma	2	55	＞35	Left	3	T2	Yes	1	N1	Yes	No	No	+	Low expression	-	30	High expression	B(HER2-)	60	＞35	-	Low expression	-	30	High expresison	B(HER2-)	Ipsilateral axillary lymph nodes	Local recurrence	64	No	B(HER2-)→B(HER2-)	Yes	(+)→(-)	No	(+)→(+)	No	(-)→(-)	No	High expression→High expression
68	4573647	Invasive ductal carcinoma	2	45	＞35	Left	2.3	T2	Unknown	Unknown	Unknown	Yes	Yes	No	+	High expression	-	Unknown	Unknown	Unknown	55	＞35	+	High expression	-	20	Low expresison	A	Esophagus	Distant metastasis	120	Unknown	Unknown	No	(+)→(+)	No	(+)→(+)	No	(-)→(-)	Unknown	Unknown
69	4499436	Invasive ductal carcinoma	2	56	＞35	Left	1.5	T1	Yes	1	N1	Yes	Yes	No	+	Low expression	-	60	High expression	B(HER2-)	61	＞35	+	High expression	-	5	Low expresison	A	Lung/pleura	Distant metastasis	58	Yes	B(HER2-)→A	No	(+)→(+)	No	(+)→(+)	No	(-)→(-)	Yes	High expression→Low expression
70	4544567	Invasive ductal carcinoma	2	41	＞35	Left	3	T2	Yes	11	N3	No	Yes	No	-	-	-	80	High expression	Basal type	45	＞35	-	-	-	30	High expresison	Basal type	Pericardial effusion	Distant metastasis	49	No	Basal type→Basal type	No	(-)→(-)	No	(-)→(-)	No	(-)→(-)	No	High expression→High expression
71	4419083	Invasive ductal carcinoma	2	36	＞35	Right	3	T2	Yes	4	N2	No	Yes	No	+	High expression	-	40	High expression	B(HER2-)	42	＞35	+	High expression	-	30	High expresison	B(HER2-)	Ipsilateral chest wall	Local recurrence	76	No	B(HER2-)→B(HER2-)	No	(+)→(+)	No	(+)→(+)	No	(-)→(-)	No	High expression→High expression
72	4538857	Invasive ductal carcinoma	2	60	＞35	Left	2.5	T2	Yes	2	N1	No	Yes	No	-	-	-	40	High expression	Basal type	62	＞35	-	-	-	50	High expresison	Basal type	Hydrothorax and ascites	Distant metastasis	22	No	Basal type→Basal type	No	(-)→(-)	No	(-)→(-)	No	(-)→(-)	No	High expression→High expression
73	4563482	Invasive ductal carcinoma	3	65	＞35	Left	10	T3	Yes	3	N1	No	Yes	No	-	-	-	80	High expression	Basal type	66	＞35	-	-	-	50	High expresison	Basal type	Ipsilateral chest wall	Local recurrence	13	No	Basal type→Basal type	No	(-)→(-)	No	(-)→(-)	No	(-)→(-)	No	High expression→High expression
74	4446577	Invasive ductal carcinoma	2	55	＞35	Left	1.5	T1	No	0	N0	No	Yes	No	+	Low expression	-	20	Low expression	B(HER2-)	60	＞35	+	Low expression	-	30	High expresison	B(HER2-)	Peripheral lymph nodes	Distant metastasis	65	No	B(HER2-)→B(HER2-)	No	(+)→(+)	No	(+)→(+)	No	(-)→(-)	Yes	Low expression→High expression
75	4442851	Other	2	72	＞35	Left	2	T1	Yes	9	N2	Yes	Yes	No	+	High expression	-	10	Low expression	A	73	＞35	+	-	-	30	High expresison	B(HER2-)	Peripheral lymph nodes	Distant metastasis	68	Yes	A→B(HER2-)	No	(+)→(+)	Yes	(+)→(-)	No	(-)→(-)	Yes	Low expression→High expression
76	4446886	Invasive ductal carcinoma	2	47	＞35	Right	6	T3	Yes	1	N1	No	Yes	No	+	High expression	-	30-35	High expression	B(HER2-)	54	＞35	+	-	-	40	High expresison	B(HER2-)	Lung/pleura	Distant metastasis	82	No	B(HER2-)→B(HER2-)	No	(+)→(+)	Yes	(+)→(-)	No	(-)→(-)	No	High expression→High expression
77	4562221	Invasive ductal carcinoma	2	56	＞35	Left	2.5	T2	No	0	N0	No	Yes	Yes	-	-	+	20	Low expression	HER2-overexpression	62	＞35	-	-	Unknown	30	High expresison	Unknown	Lung/pleura	Distant metastasis	70	Unknown	Unknown	No	(-)→(-)	No	(-)→(-)	Unknown	Unknown	Yes	Low expression→High expression
78	4450280	Invasive ductal carcinoma	2	54	＞35	Left	6	T3	Yes	18	N3	No	Yes	No	-	-	+	10	Low expression	HER2-overexpression	60	＞35	-	-	+	30	High expresison	HER2-overexpression	Liver	Distant metastasis	69	No	HER2-overexpression→HER2-overexpression	No	(-)→(-)	No	(-)→(-)	No	(+)→(+)	Yes	Low expression→High expression
79	4530275	Invasive ductal carcinoma	2	63	＞35	Left	3	T2	Yes	16	N3	No	Yes	Yes	-	-	+	10	Low expression	HER2-overexpression	65	＞35	-	-	-	30	High expresison	Basal type	Ipsilateral chest wall	Local recurrence	27	Yes	HER2-overexpression→Basal type	No	(-)→(-)	No	(-)→(-)	Yes	(+)→(-)	Yes	Low expression→High expression
80	4526574	Invasive ductal carcinoma	3	51	＞35	Right	3	T2	Yes	1	N1	Yes	Yes	No	+	-	-	65	High expression	B(HER2-)	54	＞35	+	-	-	30	High expresison	B(HER2-)	Lung/pleura	Distant metastasis	36	No	B(HER2-)→B(HER2-)	No	(+)→(+)	No	(-)→(-)	No	(-)→(-)	No	High expression→High expression
81	4487065	Invasive ductal carcinoma	3	37	＞35	Right	7	T3	Yes	2	N1	No	Yes	Yes	-	-	+	21	Low expression	HER2-overexpression	41	＞35	-	-	+	30	High expresison	HER2-overexpression	Peripheral lymph nodes	Distant metastasis	48	No	HER2-overexpression→HER2-overexpression	No	(-)→(-)	No	(-)→(-)	No	(+)→(+)	Yes	Low expression→High expression
82	4539701	Invasive ductal carcinoma	Unknown	48	＞35	Right	1.3	T1	Yes	1	N1	Yes	Yes	Yes	+	High expression	-	30	High expression	B(HER2-)	58	＞35	-	-	+	30	High expresison	HER2-overexpression	Peripheral lymph nodes	Distant metastasis	122	Yes	B(HER2-)→HER2-overexpression	Yes	(+)→(-)	Yes	(+)→(-)	Yes	(-)→(+)	No	High expression→High expression
83	4471534	Other	3	33	≤35	Left	3	T2	Yes	1	N1	No	Yes	No	-	-	-	80	High expression	Basal type	37	＞35	-	-	-	80	High expresison	Basal type	Ipsilateral chest wall	Local recurrence	55	No	Basal type→Basal type	No	(-)→(-)	No	(-)→(-)	No	(-)→(-)	No	High expression→High expression
84	4583926	Invasive ductal carcinoma	2	36	＞35	Right	1.9	T1	Yes	5	N2	Yes	Yes	No	+	Low expression	-	40	High expression	B(HER2-)	38	＞35	+	-	-	40	High expresison	B(HER2-)	Ipsilateral chest wall	Local recurrence	36	No	B(HER2-)→B(HER2-)	No	(+)→(+)	Yes	(+)→(-)	No	(-)→(-)	No	High expression→High expression
85	4546905	Invasive ductal carcinoma	2	45	＞35	Left	2	T1	Yes	6	N2	Yes	Yes	No	+	Low expression	-	0	Low expression	B(HER2-)	54	＞35	-	-	-	60	High expresison	Basal type	Ipsilateral chest wall	Local recurrence	112	Yes	B(HER2-)→Basal type	Yes	(+)→(-)	Yes	(+)→(-)	No	(-)→(-)	Yes	Low expression→High expression
86	4504322	Invasive ductal carcinoma	Unknown	40	＞35	Right	1	T1	No	0	N0	Yes	Yes	No	+	High expression	-	30	High expression	B(HER2-)	47	＞35	+	Low expression	-	30	High expresison	B(HER2-)	Liver	Distant metastasis	88	No	B(HER2-)→B(HER2-)	No	(+)→(+)	No	(+)→(+)	No	(-)→(-)	No	High expression→High expression
87	4544623	Invasive ductal carcinoma	Unknown	57	＞35	Left	4	T2	Yes	8	N2	Yes	Yes	No	+	Low expression	-	45	High expression	B(HER2-)	59	＞35	+	High expression	-	40	High expresison	B(HER2-)	Ipsilateral chest wall	Local recurrence	25	No	B(HER2-)→B(HER2-)	No	(+)→(+)	No	(+)→(+)	No	(-)→(-)	No	High expression→High expression
88	4479955	Invasive ductal carcinoma	2	48	＞35	Right	5	T2	Yes	6	N2	No	Yes	Yes	-	-	+	20	Low expression	HER2-overexpression	53	＞35	-	-	+	40	High expresison	HER2-overexpression	Ipsilateral axillary lymph nodes	Local recurrence	57	No	HER2-overexpression→HER2-overexpression	No	(-)→(-)	No	(-)→(-)	No	(+)→(+)	Yes	Low expression→High expression
89	4585850	Invasive ductal carcinoma	2	66	＞35	Left	4	T2	Yes	3	N1	No	Yes	No	+	High expression	-	40	High expression	B(HER2-)	69	＞35	+	High expression	-	40	High expresison	B(HER2-)	Liver	Distant metastasis	27	No	B(HER2-)→B(HER2-)	No	(+)→(+)	No	(+)→(+)	No	(-)→(-)	No	High expression→High expression
90	4549927	Invasive ductal carcinoma	2	60	＞35	Right	1.5	T1	Yes	3	N1	Yes	Yes	No	+	High expression	-	30	High expression	B(HER2-)	72	＞35	-	-	-	Unknown	Unknown	Basal type	Hydrothorax and ascites	Distant metastasis	145	Yes	B(HER2-)→Basal type	Yes	(+)→(-)	Yes	(+)→(-)	No	(-)→(-)	Unknown	Unknown
91	4513237	Invasive ductal carcinoma	3	56	＞35	Right	4	T2	Yes	23	N3	Yes	Yes	No	-	-	-	0	Low expression	Basal type	70	＞35	+	Low expression	Unknown	40	High expresison	Unknown	Ipsilateral chest wall	Local recurrence	166	Unknown	Unknown	Yes	(-)→(+)	Yes	(-)→(+)	Unknown	Unknown	Yes	Low expression→High expression
92	4490985	Other	2	54	＞35	Right	3.2	T2	Yes	1	N1	No	Yes	Yes	-	-	+	50	High expression	HER2-overexpression	58	＞35	-	Low expression	+	30	High expresison	B(HER2+)	Hydrothorax and ascites	Distant metastasis	48	Yes	HER2-overexpression→B(HER2+)	No	(-)→(+)	Yes	(-)→(+)	No	(+)→(+)	No	High expression→High expression
93	4505395	Invasive ductal carcinoma	2	47	＞35	Right	1.5	T1	No	0	N0	No	No	No	+	High expression	Unknown	40	High expression	Unknown	51	＞35	+	High expression	+	40	High expresison	B(HER2+)	Ipsilateral axillary lymph nodes	Local recurrence	44	Unknown	Unknown	No	(+)→(+)	No	(+)→(+)	Unknown	Unknown	No	High expression→High expression
94	4507129	Invasive ductal carcinoma	Unknown	35	≤35	Right	Unknown	Unknown	Yes	4	N2	Yes	Yes	No	+	High expression	-	35	High expression	B(HER2-)	43	＞35	+	High expression	-	10	Low expresison	A	Bone	Distant metastasis	93	Yes	B(HER2-)→A	No	(+)→(+)	No	(+)→(+)	No	(-)→(-)	Yes	High expression→Low expression
95	4400991	Invasive ductal carcinoma	3	50	＞35	Left	6	T3	Yes	3	N1	No	Yes	No	+	High expression	-	50	High expression	B(HER2-)	58	＞35	+	High expression	-	60	High expresison	B(HER2-)	Lung/pleura	Distant metastasis	92	No	B(HER2-)→B(HER2-)	No	(+)→(+)	No	(+)→(+)	No	(-)→(-)	No	High expression→High expression
96	4589774	Invasive ductal carcinoma	Unknown	59	＞35	Left	1.7	T1	No	0	N0	Yes	Yes	No	+	-	-	25	Low expression	B(HER2-)	67	＞35	+	High expression	-	10	Low expresison	A	Hydrothorax and ascites	Distant metastasis	89	Yes	B(HER2-)→A	No	(+)→(+)	Yes	(-)→(+)	No	(-)→(-)	No	Low expression→Low expresison
97	4589990	Invasive ductal carcinoma	3	38	＞35	Left	10	T3	Yes	6	N2	No	Yes	No	-	-	-	60	High expression	Basal type	39	＞35	-	-	-	60	High expresison	Basal type	Peripheral lymph nodes	Distant metastasis	6	No	Basal type→Basal type	No	(-)→(+)	No	(-)→(-)	No	(-)→(-)	No	High expression→High expression
98	4469877	Invasive ductal carcinoma	Unknown	53	＞35	Left	4	T2	Yes	3	N1	Yes	Yes	No	-	High expression	-	20	Low expression	A	58	＞35	+	-	Unknown	10	Low expresison	Unknown	Ipsilateral chest wall	Local recurrence	59	Unknown	Unknown	Yes	(-)→(+)	Yes	(+)→(-)	Unknown	Unknown	No	Low expression→Low expresison
99	4564305	Invasive ductal carcinoma	3	53	＞35	Left	1.5	T1	No	0	N0	Yes	Yes	No	+	High expression	-	70	High expression	B(HER2-)	58	＞35	+	Low expression	-	1	Low expresison	B(HER2-)	Pericardial effusion	Distant metastasis	55	No	B(HER2-)→B(HER2-)	No	(+)→(+)	No	(+)→(+)	No	(-)→(-)	Yes	High expression→Low expression
100	4516841	Invasive ductal carcinoma	2	55	＞35	Left	2	T1	No	0	N0	Yes	Yes	No	+	-	-	Unknown	Unknown	B(HER2-)	60	＞35	-	-	-	20	Low expresison	Basal type	Ipsilateral chest wall	Local recurrence	55	Yes	B(HER2-)→Basal type	Yes	(+)→(-)	No	(-)→(-)	No	(-)→(-)	Unknown	Unknown
101	4479025	Invasive ductal carcinoma	2	51	＞35	Right	1.8	T1	Yes	14	N3	Yes	Yes	No	+	Low expression	-	30	High expression	B(HER2-)	59	＞35	+	-	-	20	Low expresison	B(HER2-)	Pericardial effusion	Distant metastasis	91	No	B(HER2-)→B(HER2-)	No	(+)→(+)	Yes	(+)→(-)	No	(-)→(-)	Yes	High expression→Low expression
102	4530262	Invasive ductal carcinoma	3	59	＞35	Left	3	T2	Yes	18	N3	No	Yes	No	-	-	-	70	High expression	Basal type	66	＞35	-	-	-	30	High expresison	Basal type	Neck	Distant metastasis	78	No	Basal type→Basal type	No	(-)→(-)	No	(-)→(-)	No	(-)→(-)	No	High expression→High expression
103	4586207	Invasive ductal carcinoma	Unknown	30	≤35	Right	6	T3	No	0	N0	No	Yes	No	-	-	-	80	High expression	Basal type	32	≤35	-	-	-	60	High expresison	Basal type	Liver	Distant metastasis	11	No	Basal type→Basal type	No	(-)→(-)	No	(-)→(-)	No	(-)→(-)	No	High expression→High expression
104	4593807	Invasive ductal carcinoma	3	41	＞35	Left	3.5	T2	Yes	2	N1	Yes	Yes	No	+	High expression	-	Unknown	Unknown	Unknown	45	＞35	+	Low expression	-	20	Low expresison	B(HER2-)	Lung/pleura	Distant metastasis	43	Unknown	Unknown	No	(+)→(+)	No	(+)→(+)	No	(-)→(-)	Unknown	Unknown
105	4475540	Invasive ductal carcinoma	2	34	≤35	Left	2.8	T2	Yes	4	N2	No	Yes	Yes	-	-	Unknown	20	Low expression	Unknown	43	＞35	-	-	Unknown	10	Low expresison	Unknown	Hydrothorax and ascites	Distant metastasis	114	Unknown	Unknown	No	(-)→(-)	No	(-)→(-)	Unknown	Unknown	No	Low expression→Low expresison
106	4453078	Invasive ductal carcinoma	2	35	≤35	Left	1.2	T1	Yes	1	N1	No	No	No	+	Low expression	-	30	High expression	B(HER2-)	42	＞35	+	Low expression	-	20	Low expresison	B(HER2-)	Ipsilateral chest wall	Local recurrence	81	No	B(HER2-)→B(HER2-)	No	(+)→(+)	No	(+)→(+)	No	(-)→(-)	Yes	High expression→Low expression
107	4470980	Other	3	33	≤35	Right	8	T3	Yes	18	N3	No	Yes	Yes	-	-	+	40	High expression	HER2-overexpression	38	＞35	-	Low expression	+	50	High expresison	B(HER2+)	Lung/pleura	Distant metastasis	62	Yes	HER2-overexpression→B(HER2+)	No	(-)→(-)	Yes	(-)→(+)	No	(+)→(+)	No	High expression→High expression
108	4475270	Invasive ductal carcinoma	2	40	＞35	Right	2.5	T2	Yes	1	N1	Yes	Yes	No	+	High expression	-	30	High expression	B(HER2-)	45	＞35	+	-	-	5	Low expresison	B(HER2-)	Bone	Distant metastasis	63	No	B(HER2-)→B(HER2-)	No	(+)→(+)	Yes	(+)→(-)	No	(-)→(-)	Yes	High expression→Low expression
109	4534590	Invasive ductal carcinoma	1	44	＞35	Right	11	T3	No	0	N0	No	Yes	Yes	+	Low expression	+	20	Low expression	B(HER2+)	48	＞35	+	-	+	20	Low expresison	B(HER2+)	Ipsilateral axillary lymph nodes	Local recurrence	38	No	B(HER2+)→B(HER2+)	No	(+)→(+)	Yes	(+)→(-)	No	(+)→(+)	No	Low expression→Low expresison
110	4497395	Invasive ductal carcinoma	3	53	＞35	Left	1.3	T1	Yes	9	N2	Yes	Yes	No	+	High expression	-	40	High expression	B(HER2-)	57	＞35	+	High expression	-	20	Low expresison	A	Ipsilateral chest wall	Local recurrence	49	Yes	B(HER2-)→A	No	(+)→(+)	No	(+)→(+)	No	(-)→(-)	Yes	High expression→Low expression
111	4601172	Other	Unknown	48	＞35	Right	Unknown	Unknown	Yes	2	N1	Yes	Yes	Yes	+	-	+	30	High expression	B(HER2+)	53	＞35	+	-	+	20	High expresison	B(HER2+)	Hydrothorax and ascites	Distant metastasis	60	No	B(HER2+)→B(HER2+)	No	(+)→(+)	No	(-)→(-)	No	(+)→(+)	No	High expression→High expression
112	4458770	Other	2	58	＞35	Left	9	T3	No	0	N0	No	Yes	No	-	-	-	20	Low expression	Basal type	63	＞35	+	Low expression	-	10	Low expresison	B(HER2-)	Bone	Distant metastasis	72	Yes	Basal type→B(HER2-)	Yes	(-)→(+)	Yes	(-)→(+)	No	(-)→(-)	No	Low expression→Low expresison
113	4366754	Invasive ductal carcinoma	2	42	＞35	Right	5	T2	Yes	2	N1	Yes	Yes	No	+	High expression	-	5	Low expression	A	52	＞35	+	High expression	-	1	Low expresison	A	Hydrothorax and ascites	Distant metastasis	131	No	A→A	No	(+)→(+)	No	(+)→(+)	No	(-)→(-)	No	Low expression→Low expresison
114	4470795	Invasive ductal carcinoma	3	56	＞35	Right	5	T2	Yes	2	N1	Yes	Yes	No	+	-	-	50	High expression	B(HER2-)	61	＞35	+	-	-	40	High expresison	B(HER2-)	Contralateral axillary lymph nodes	Distant metastasis	67	No	B(HER2-)→B(HER2-)	No	(+)→(+)	No	(-)→(-)	No	(-)→(-)	No	High expression→High expression
115	4508395	Invasive ductal carcinoma	2	58	＞35	Left	3	T2	Yes	5	N2	Yes	Yes	No	+	High expression	-	10	Low expression	A	61	＞35	+	-	-	50	High expresison	B(HER2-)	Lung/pleura	Distant metastasis	50	Yes	A→B(HER2-)	No	(+)→(+)	Yes	(+)→(-)	No	(-)→(-)	Yes	Low expression→High expression
116	4536011	Invasive ductal carcinoma	2	68	＞35	Left	1.5	T1	No	0	N0	No	Yes	No	+	High expression	-	40	High expression	B(HER2-)	71	＞35	+	High expression	-	40	High expresison	B(HER2-)	Ipsilateral chest wall	Local recurrence	39	No	B(HER2-)→B(HER2-)	No	(+)→(+)	No	(+)→(+)	No	(-)→(-)	No	High expression→High expression
117	4604549	Invasive ductal carcinoma	Unknown	44	＞35	Right	3	T2	Yes	2	N1	Yes	Yes	No	+	High expression	Unknown	Unknown	Unknown	Unknown	61	＞35	+	-	-	10	Low expresison	B(HER2-)	Bone	Distant metastasis	205	Unknown	Unknown	No	(+)→(+)	Yes	(+)→(-)	Unknown	Unknown	Unknown	Unknown
118	4532707	Invasive ductal carcinoma	3	60	＞35	Left	3.5	T2	Yes	16	N3	No	Yes	No	-	-	+	30-40	High expression	HER2-overexpression	63	＞35	-	-	-	50	High expresison	Basal type	Liver	Distant metastasis	42	Yes	HER2-overexpression→Basal type	No	(-)→(-)	No	(-)→(-)	Yes	(+)→(-)	No	High expression→High expression
119	4492455	Invasive ductal carcinoma	3	48	＞35	Left	2.5	T2	No	0	N0	Yes	Yes	No	+	High expression	-	40	High expression	B(HER2-)	52	＞35	+	High expression	-	20	Low expresison	A	Neck	Distant metastasis	58	Yes	B(HER2-)→A	No	(+)→(+)	No	(+)→(+)	No	(-)→(-)	Yes	High expression→Low expression
120	4420295	Invasive ductal carcinoma	Unknown	45	＞35	Left	2.5	T2	Yes	13	N3	No	Yes	No	+	High expression	-	40	High expression	B(HER2-)	59	＞35	-	-	-	50	High expresison	Basal type	Ipsilateral chest wall	Local recurrence	156	Yes	B(HER2-)→Basal type	Yes	(+)→(-)	Yes	(+)→(-)	No	(-)→(-)	No	High expression→High expression
121	4551907	Other	Unknown	49	＞35	Right	2.2	T2	Yes	1	N1	No	Yes	Yes	-	-	Unknown	30	High expression	Unknown	51	＞35	-	-	-	40	High expresison	Basal type	Ipsilateral axillary lymph nodes	Local recurrence	32	Unknown	Unknown	No	(-)→(-)	No	(-)→(-)	Unknown	Unknown	No	High expression→High expression
122	4598700	Invasive ductal carcinoma	2	61	＞35	Right	5.2	T3	Yes	1	N1	No	Yes	No	-	-	-	60	High expression	Basal type	62	＞35	+	-	-	80	High expresison	B(HER2-)	Contralateral axillary lymph nodes	Distant metastasis	15	Yes	Basal type→B(HER2-)	Yes	(-)→(+)	No	(-)→(-)	No	(-)→(-)	No	High expression→High expression
123	4553461	Invasive ductal carcinoma	2	49	＞35	Left	1.6	T1	Yes	1	N1	Yes	Yes	No	+	High expression	-	15	Low expression	A	52	＞35	-	-	+	60	High expresison	HER2-overexpression	Neck	Distant metastasis	34	Yes	A→HER2-overexpression	Yes	(+)→(-)	Yes	(+)→(-)	Yes	(-)→(+)	Yes	Low expression→High expression
124	4607548	Invasive ductal carcinoma	Unknown	54	＞35	Right	2	T1	No	0	N0	No	No	No	-	-	+	30	High expression	HER2-overexpression	58	＞35	-	-	+	60	High expresison	HER2-overexpression	Liver	Distant metastasis	44	No	HER2-overexpression→HER2-overexpression	No	(-)→(-)	No	(-)→(-)	No	(+)→(+)	No	High expression→High expression
125	4469992	Invasive ductal carcinoma	3	39	＞35	Left	6	T3	No	0	N0	Yes	Yes	Yes	+	High expression	+	30	High expression	B(HER2+)	45	＞35	+	Low expression	+	40	High expresison	B(HER2+)	Contralateral axillary lymph nodes	Distant metastasis	69	No	B(HER2+)→B(HER2+)	No	(+)→(+)	No	(+)→(+)	No	(+)→(+)	No	High expression→High expression
126	4481972	Invasive ductal carcinoma	2	74	＞35	Left	5	T2	Yes	16	N3	No	Yes	No	+	High expression	-	30	High expression	B(HER2-)	80	＞35	+	High expression	-	10	Low expresison	A	Ipsilateral chest wall	Local recurrence	65	Yes	B(HER2-)→A	No	(+)→(+)	No	(+)→(+)	No	(-)→(-)	Yes	High expression→Low expression
127	4449153	Other	2	43	＞35	Right	1	T1	Yes	1	N1	No	Yes	Yes	-	-	+	30	High expression	HER2-overexpression	48	＞35	-	-	+	70	High expresison	HER2-overexpression	Lung/pleura	Distant metastasis	110	No	HER2-overexpression→HER2-overexpression	No	(-)→(-)	No	(-)→(-)	No	(+)→(+)	No	High expression→High expression
128	4565900	Invasive ductal carcinoma	2	46	＞35	Right	1.2	T1	Unknown	Unknown	Unknown	Yes	Yes	No	+	-	-	20	Low expression	B(HER2-)	52	＞35	+	High expression	-	40	High expresison	B(HER2-)	Liver	Distant metastasis	98	No	B(HER2-)→B(HER2-)	No	(+)→(+)	Yes	(-)→(+)	No	(-)→(-)	Yes	Low expression→High expression
129	4571449	Invasive ductal carcinoma	3	57	＞35	Right	4	T2	Yes	3	N1	No	Yes	No	-	Low expression	-	20	Low expression	B(HER2-)	59	＞35	-	Low expression	-	10	Low expresison	B(HER2-)	Ipsilateral chest wall	Local recurrence	23	No	B(HER2-)→B(HER2-)	No	(-)→(-)	No	(+)→(+)	No	(-)→(-)	No	Low expression→Low expresison
130	4588011	Invasive ductal carcinoma	2	43	＞35	Left	0.5	T1	Yes	3	N1	No	Yes	No	+	Low expression	+	60	High expression	B(HER2+)	47	＞35	-	-	-	10	Low expresison	Basal type	Bone	Distant metastasis	62	Yes	B(HER2+)→Basal type	Yes	(+)→(-)	Yes	(+)→(-)	Yes	(+)→(-)	Yes	High expression→Low expression
131	4466939	Invasive ductal carcinoma	Unknown	56	＞35	Left	1.2	T1	Yes	13	N3	Yes	Yes	Yes	+	-	-	20	Low expression	B(HER2-)	63	＞35	+	-	+	30	High expresison	B(HER2+)	Liver	Distant metastasis	79	Yes	B(HER2-)→B(HER2+)	No	(+)→(+)	No	(-)→(-)	Yes	(-)→(+)	Yes	Low expression→High expression
132	4502080	Invasive ductal carcinoma	2	32	≤35	Right	3	T2	Yes	1	N1	Yes	Yes	No	+	High expression	-	10	Low expression	A	46	＞35	-	-	-	20	Low expresison	Basal type	Liver	Distant metastasis	163	Yes	A→Basal type	Yes	(+)→(-)	Yes	(+)→(-)	No	(-)→(-)	No	Low expression→Low expresison
133	4569285	Invasive ductal carcinoma	2	41	＞35	Left	4	T2	Yes	14	N3	Yes	Yes	No	+	High expression	-	30	High expression	B(HER2-)	43	＞35	+	High expression	-	30	High expresison	B(HER2-)	Liver	Distant metastasis	26	No	B(HER2-)→B(HER2-)	No	(+)→(+)	No	(+)→(+)	No	(-)→(-)	No	High expression→High expression
134	4612801	Invasive ductal carcinoma	3	53	＞35	Right	1.8	T1	Yes	3	N1	Yes	Yes	No	+	Low expression	-	20	Low expression	B(HER2-)	62	＞35	+	-	-	50	High expresison	B(HER2-)	Ipsilateral chest wall	Local recurrence	94	No	B(HER2-)→B(HER2-)	No	(+)→(+)	Yes	(+)→(-)	No	(-)→(-)	Yes	Low expression→High expression
135	4540994	Invasive ductal carcinoma	3	50	＞35	Right	1	T1	Yes	1	N1	Yes	Yes	No	-	-	-	10	Low expression	Basal type	57	＞35	-	-	-	60	High expresison	Basal type	Neck	Distant metastasis	81	No	Basal type→Basal type	No	(-)→(-)	No	(-)→(-)	No	(-)→(-)	Yes	Low expression→High expression
136	4615267	Invasive ductal carcinoma	3	54	＞35	Left	2.5	T2	Yes	4	N2	Yes	No	No	+	Low expression	-	40	High expression	B(HER2-)	56	＞35	+	High expression	-	25	Low expresison	A	Bone	Distant metastasis	22	Yes	B(HER2-)→A	No	(+)→(+)	No	(+)→(+)	No	(-)→(-)	Yes	High expression→Low expression
137	4476610	Other	3	52	＞35	Left	3	T2	Yes	1	N1	No	Yes	No	-	-	+	30	High expression	HER2-overexpression	58	＞35	-	-	+	10	Low expresison	HER2-overexpression	Bone	Distant metastasis	59	No	HER2-overexpression→HER2-overexpression	No	(-)→(-)	No	(-)→(-)	No	(+)→(+)	Yes	High expression→Low expression
138	4517901	Invasive ductal carcinoma	3	46	＞35	Right	2	T1	Yes	16	N3	No	Yes	No	-	-	+	30	High expression	HER2-overexpression	51	＞35	-	-	+	40	High expresison	HER2-overexpression	Liver	Distant metastasis	56	No	HER2-overexpression→HER2-overexpression	No	(-)→(-)	No	(-)→(-)	No	(+)→(+)	No	High expression→High expression
139	4543425	Invasive ductal carcinoma	2	41	＞35	Left	9	T3	Yes	11	N3	No	Yes	Yes	+	High expression	-	40	High expression	B(HER2-)	45	＞35	+	Low expression	-	10	Low expresison	B(HER2-)	Hydrothorax and ascites	Distant metastasis	39	No	B(HER2-)→B(HER2-)	No	(+)→(+)	No	(+)→(+)	No	(-)→(-)	Yes	High expression→Low expression
140	4577899	Invasive ductal carcinoma	Unknown	78	＞35	Left	3.5	T2	Yes	1	N1	Yes	Yes	No	+	High expression	-	30	High expression	B(HER2-)	80	＞35	-	-	-	30	High expresison	Basal type	Lacrimal sac	Distant metastasis	22	Yes	B(HER2-)→Basal type	Yes	(+)→(-)	Yes	(+)→(-)	No	(-)→(-)	No	High expression→High expression
141	4526176	Invasive ductal carcinoma	2	37	＞35	Right	1.8	T1	Yes	2	N1	Yes	Yes	No	+	High expression	-	40	High expression	B(HER2-)	41	＞35	+	High expression	-	50	High expresison	B(HER2-)	Ipsilateral chest wall	Local recurrence	50	No	B(HER2-)→B(HER2-)	No	(+)→(+)	No	(+)→(+)	No	(-)→(-)	No	High expression→High expression
142	4522841	Invasive ductal carcinoma	3	75	＞35	Right	5	T2	Yes	5	N2	No	Yes	No	-	-	-	80	High expression	Basal type	79	＞35	-	-	-	80	High expresison	Basal type	Lung/pleura	Distant metastasis	52	No	Basal type→Basal type	No	(-)→(-)	No	(-)→(-)	No	(-)→(-)	No	High expression→High expression
143	4539595	Invasive ductal carcinoma	3	32	≤35	Left	3	T2	No	0	N0	Yes	Yes	No	-	Low expression	+	25	Low expression	B(HER2+)	33	≤35	-	Low expression	+	40	High expresison	B(HER2+)	Ipsilateral chest wall	Local recurrence	11	No	B(HER2+)→B(HER2+)	No	(-)→(-)	No	(+)→(+)	No	(+)→(+)	Yes	Low expression→High expression
144	4618658	Invasive ductal carcinoma	Unknown	62	＞35	Right	Unknown	Unknown	Yes	1	N1	Yes	Yes	No	+	Low expression	-	20	Low expression	B(HER2-)	66	＞35	+	High expression	-	80	High expresison	B(HER2-)	Bone	Distant metastasis	36	No	B(HER2-)→B(HER2-)	No	(+)→(+)	No	(+)→(+)	No	(-)→(-)	Yes	Low expression→High expression
145	4608727	Invasive ductal carcinoma	2	48	＞35	Right	2.5	T2	No	0	N0	No	Yes	Yes	-	-	Unknown	40	High expression	Unknown	52	＞35	-	-	+	40	High expresison	HER2-overexpression	Liver	Distant metastasis	46	Unknown	Unknown	No	(-)→(-)	No	(-)→(-)	Unknown	Unknown	No	High expression→High expression
146	4569302	Invasive ductal carcinoma	3	66	＞35	Right	2	T1	Yes	3	N1	No	Yes	Yes	-	-	+	40	High expression	HER2-overexpression	68	＞35	-	-	+	70	High expresison	HER2-overexpression	Lung/pleura	Distant metastasis	30	No	HER2-overexpression→HER2-overexpression	No	(-)→(-)	No	(-)→(-)	No	(+)→(+)	No	High expression→High expression
147	4556928	Invasive ductal carcinoma	2	53	＞35	Right	2	T1	Yes	1	N1	No	Yes	No	+	High expression	-	30	High expression	B(HER2-)	56	＞35	+	High expression	Unknown	30	High expresison	Unknown	Ipsilateral chest wall	Local recurrence	37	Unknown	Unknown	No	(+)→(+)	No	(+)→(+)	Unknown	Unknown	No	High expression→High expression
148	4557127	Invasive ductal carcinoma	2	40	＞35	Right	1	T1	Yes	1	N1	Yes	Yes	No	+	High expression	-	10	Low expression	A	48	＞35	+	High expression	-	20	Low expresison	A	Ovaries	Distant metastasis	103	No	A→A	No	(+)→(+)	No	(+)→(+)	No	(-)→(-)	No	Low expression→Low expresison
149	4589534	Invasive ductal carcinoma	2	40	＞35	Left	2.5	T2	Yes	8	N2	No	Yes	No	+	Low expression	-	70	High expression	B(HER2-)	41	＞35	-	-	-	70	High expresison	Basal type	Mediastinum	Distant metastasis	17	Yes	B(HER2-)→Basal type	Yes	(+)→(-)	Yes	(+)→(-)	No	(-)→(-)	No	High expression→High expression
150	4622304	Invasive ductal carcinoma	Unknown	39	＞35	Right	4	T2	No	0	N0	No	Yes	No	+	High expression	+	5	Low expression	B(HER2+)	51	＞35	+	High expression	-	10	Low expresison	A	Ipsilateral chest wall	Local recurrence	146	Yes	B(HER2+)→A	No	(+)→(+)	No	(+)→(+)	Yes	(+)→(-)	No	Low expression→Low expresison
151	4556319	Invasive ductal carcinoma	Unknown	54	＞35	Right	2.5	T2	Yes	9	N2	No	Yes	Yes	-	-	+	20	Low expression	HER2-overexpression	57	＞35	-	-	+	40	High expresison	HER2-overexpression	Neck	Distant metastasis	38	No	HER2-overexpression→HER2-overexpression	No	(-)→(-)	No	(-)→(-)	No	(+)→(+)	Yes	Low expression→High expression
152	4548980	Invasive ductal carcinoma	Unknown	50	＞35	Left	5	T2	Yes	7	N2	Yes	Yes	No	+	Low expression	-	20	Low expression	B(HER2-)	54	＞35	+	-	Unknown	30	High expresison	Unknown	Liver	Distant metastasis	41	Unknown	Unknown	No	(+)→(+)	Yes	(+)→(-)	Unknown	Unknown	Yes	Low expression→High expression
153	4597184	Invasive ductal carcinoma	Unknown	32	≤35	Left	2	T1	Yes	2	N1	Yes	Yes	Yes	+	-	+	30	High expression	B(HER2+)	39	＞35	+	-	+	40	High expresison	B(HER2+)	Lung/pleura	Distant metastasis	89	No	B(HER2+)→B(HER2+)	No	(+)→(+)	No	(-)→(-)	No	(+)→(+)	No	High expression→High expression
154	4624282	Invasive ductal carcinoma	2	67	＞35	Right	Unknown	Unknown	No	0	N0	Yes	Yes	No	+	-	-	15	Low expression	B(HER2-)	68	＞35	+	-	-	5	Low expresison	B(HER2-)	Bone	Distant metastasis	12	No	B(HER2-)→B(HER2-)	No	(+)→(+)	No	(-)→(-)	No	(-)→(-)	No	Low expression→Low expresison
155	4524256	Invasive ductal carcinoma	2	43	＞35	Right	1.9	T1	Yes	2	N1	Yes	Yes	No	+	High expression	-	60	High expression	B(HER2-)	47	＞35	+	-	-	5	Low expresison	B(HER2-)	Bone	Distant metastasis	55	No	B(HER2-)→B(HER2-)	No	(+)→(+)	Yes	(+)→(-)	No	(-)→(-)	Yes	High expression→Low expression
156	4572584	Invasive ductal carcinoma	2	39	＞35	Left	1.1	T1	Yes	1	N1	No	Yes	No	+	-	-	20	Low expression	B(HER2-)	43	＞35	+	High expression	-	80	High expresison	B(HER2-)	Ovaries	Distant metastasis	46	No	B(HER2-)→B(HER2-)	No	(+)→(+)	Yes	(-)→(+)	No	(-)→(-)	Yes	Low expression→High expression
157	4580900	Invasive ductal carcinoma	3	66	＞35	Right	2.5	T2	Yes	8	N2	No	Yes	No	-	-	-	50	High expression	Basal type	68	＞35	+	-	-	70	High expresison	B(HER2-)	Liver	Distant metastasis	24	Yes	Basal type→B(HER2-)	Yes	(-)→(+)	No	(-)→(-)	No	(-)→(-)	No	High expression→High expression
158	4624851	Invasive ductal carcinoma	2	36	＞35	Left	0.4	T1	Yes	13	N3	Yes	Yes	No	+	High expression	-	30	High expression	B(HER2-)	42	＞35	-	-	-	40	High expresison	Basal type	Ovaries	Distant metastasis	76	Yes	B(HER2-)→Basal type	Yes	(+)→(-)	Yes	(+)→(-)	No	(-)→(-)	No	High expression→High expression
159	4525098	Invasive ductal carcinoma	3	35	≤35	Left	2.5	T2	No	0	N0	Yes	Yes	No	+	High expression	-	50	High expression	B(HER2-)	39	＞35	+	-	-	20	Low expresison	B(HER2-)	Liver	Distant metastasis	54	No	B(HER2-)→B(HER2-)	No	(+)→(+)	Yes	(+)→(-)	No	(-)→(-)	Yes	High expression→Low expression
160	4444598	Invasive ductal carcinoma	2	51	＞35	Left	3	T2	Yes	4	N2	Yes	Yes	No	+	High expression	Unknown	40	High expression	B(HER2-)	58	＞35	+	High expression	-	30	High expresison	B(HER2-)	Ipsilateral chest wall	Local recurrence	92	No	B(HER2-)→B(HER2-)	No	(+)→(+)	No	(+)→(+)	No	(-)→(-)	No	High expression→High expression
161	4547904	Invasive ductal carcinoma	Unknown	56	＞35	Left	0.8	T1	Yes	1	N1	Yes	Yes	No	+	Low expression	-	1	Low expression	B(HER2-)	60	＞35	+	Low expression	-	40	High expresison	B(HER2-)	Liver	Distant metastasis	45	No	B(HER2-)→B(HER2-)	No	(+)→(+)	No	(+)→(+)	No	(-)→(-)	Yes	Low expression→High expression
162	4573508	Invasive ductal carcinoma	Unknown	62	＞35	Left	Unknown	Unknown	Yes	5	N2	Yes	Yes	No	+	Low expression	-	40	High expression	B(HER2-)	67	＞35	-	-	-	30	High expresison	Basal type	Lung/pleura	Distant metastasis	57	Yes	B(HER2-)→Basal type	Yes	(+)→(-)	Yes	(+)→(-)	No	(-)→(-)	No	High expression→High expression
163	4475270	Invasive ductal carcinoma	2	40	＞35	Right	2.5	T2	Yes	1	N1	Yes	Yes	No	+	-	-	30	High expression	B(HER2-)	47	＞35	+	-	-	Unknown	Unknown	B(HER2-)	Bone	Distant metastasis	83	No	B(HER2-)→B(HER2-)	No	(+)→(+)	No	(-)→(-)	No	(-)→(-)	Unknown	Unknown
164	4644939	Invasive ductal carcinoma	3	53	＞35	Right	2	T1	Yes	6	N2	Yes	Yes	Yes	-	-	+	60	High expression	HER2-overexpression	60	＞35	-	-	+	Unknown	Unknown	HER2-overexpression	Brain	Distant metastasis	92	No	HER2-overexpression→HER2-overexpression	No	(-)→(-)	No	(-)→(-)	No	(+)→(+)	Unknown	Unknown
165	4649753	Invasive ductal carcinoma	3	41	＞35	Left	1.5	T1	Yes	3	N1	No	Yes	Yes	-	-	+	70	High expression	HER2-overexpression	49	＞35	-	-	+	20	Low expresison	HER2-overexpression	Hydrothorax and ascites	Distant metastasis	98	No	HER2-overexpression→HER2-overexpression	No	(-)→(-)	No	(-)→(-)	No	(+)→(+)	Yes	High expression→Low expression
166	4581435	Invasive ductal carcinoma	2	57	＞35	Right	Unknown	Unknown	Yes	1	N1	No	Yes	No	+	High expression	-	30	High expression	B(HER2-)	60	＞35	+	-	-	10	Low expresison	B(HER2-)	Neck	Distant metastasis	37	No	B(HER2-)→B(HER2-)	No	(+)→(+)	Yes	(+)→(-)	No	(-)→(-)	Yes	High expression→Low expression
